# Supplementary material for: Leucine Zipper Downregulated in Cancer-1 Interacts with Clathrin Adaptors to Control Epidermal Growth Factor Receptor (EGFR) Internalization and Gefitinib Response in EGFR-Mutated Non-Small Cell Lung Cancer
Source: MDPI journal article supplement (doi:10.3390/ijms25031374), 2024-01-23
Supplement: s1 [file s1]

**Title:** LDOC1 interacts with clathrin adaptors to controls EGFR internalization and gefitinib response in EGFR-Mutated Non–Small Cell Lung Cancer

**Journal:** International Journal of Molecular Science

**Authors:** Hsien-Neng Huang, Pin-Feng Hung, Yai-Ping Chen, Chia-Huei Lee\*

**Corresponding author:** C.H.L.: [chlee124@nhri.org.tw](mailto:chlee124@nhri.org.tw) ; National Institute of Cancer Research, National Health Research Institutes, No. 35, Keyan Road, Zhunan Town, Miaoli 35053, Taiwan.

**Supplementary Information**

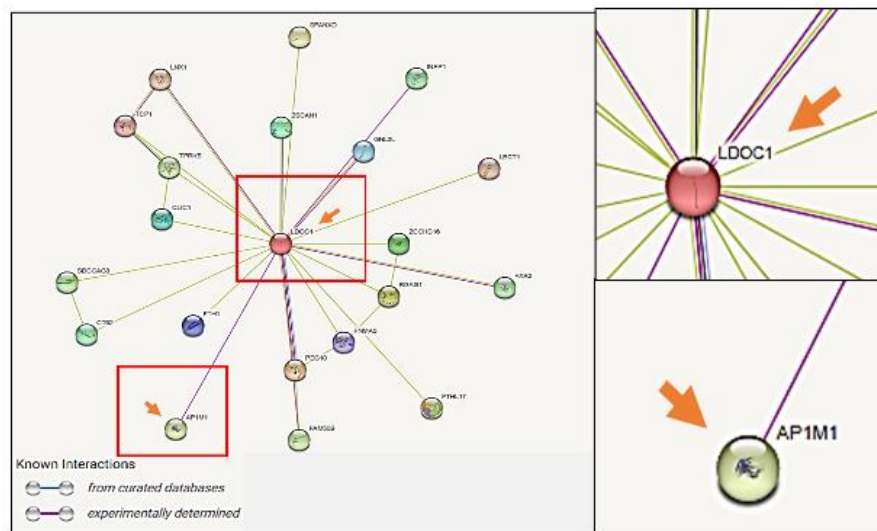

**Fig. S1** STRING database predicts interaction between LDOC1 and AP1M1 [STRING: functional protein association networks (string-db.org) version 10.0]. Red arrows indicate LDOC1 and AP1M1.

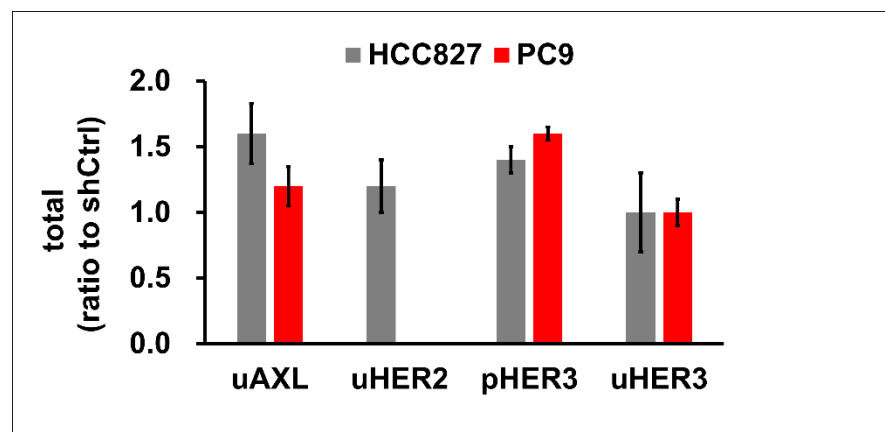

**Fig. S2** [The summary of the semiquantitative data](#) regarding [total protein lysates](#) shown in Figure 3.

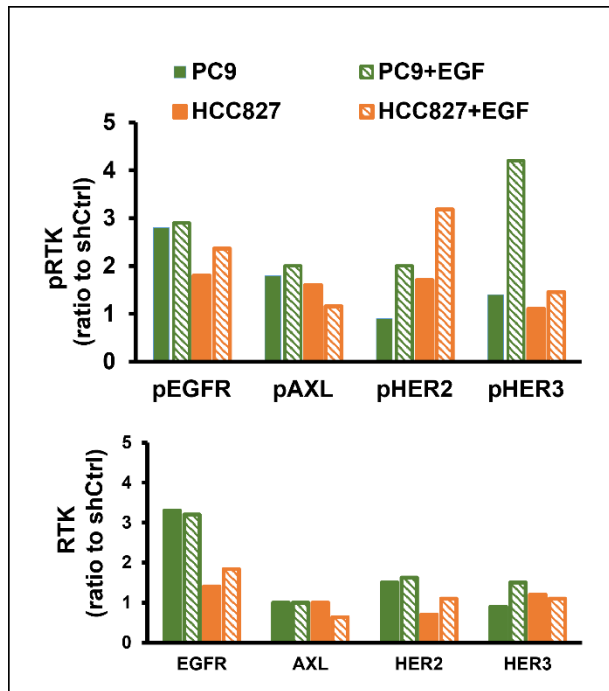

Fig. S3 Semiquantitative evaluation of the effect of LDOC1 depletion on the expression of phosphorylated (p) and unphosphorylated (u) EGFR in PC9 and HCC827 cells.
